# Supplementary material for: High expression of neuroguidin increases the sensitivity of acute myeloid leukemia cells to chemotherapeutic drugs
Source: Springer Nature journal article supplement (doi:10.1186/s13045-015-0108-6), 2015-02-18

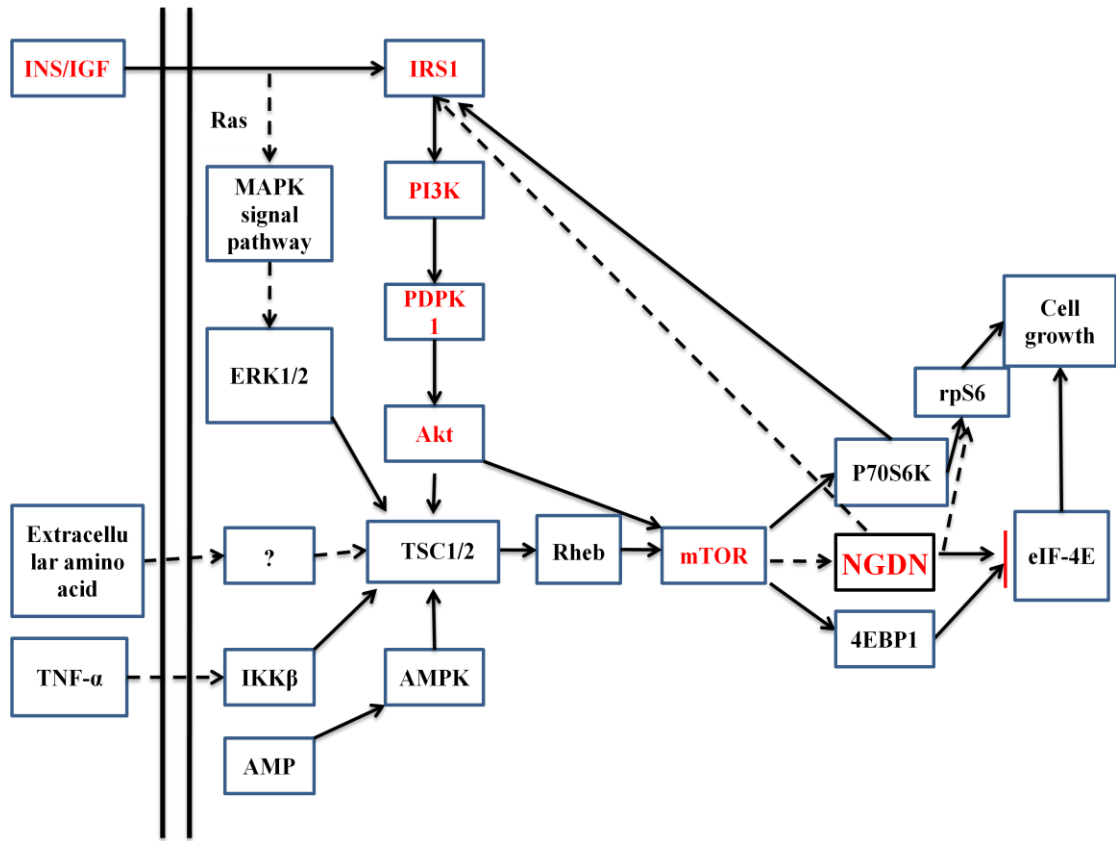

Supplement: MOESM5 [file 9777368]
